# Supplementary material for: Incidence, treatment and survival of malignant pleural and peritoneal mesothelioma: a population-based study
Source: PubMed Central journal article supplement — Thorax. 2022 Feb 11;77(12):1260–7. doi: 10.1136/thoraxjnl-2021-217709 (PMC9685713; doi:10.1136/thoraxjnl-2021-217709), 2022-02-11
Supplement: thoraxjnl-2021-217709supp003.pdf [file thoraxjnl-2021-217709supp003.pdf]

Supplementary table A: National Malignant Mesothelioma Incidence, stratified for sex

|                  | MPM (M)    | MPM (F)     | MPM (T)     | MPeM (M)   | MPeM (F)    | MPeM (T)    |
|------------------|------------|-------------|-------------|------------|-------------|-------------|
| 1989             | 5,26       | 0,64        | 2,6         | 0,33       | 0,08        | 0,19        |
| 1990             | 4,87       | 0,53        | 2,41        | 0,38       | 0,1         | 0,23        |
| 1991             | 5,15       | 0,46        | 2,45        | 0,26       | 0,1         | 0,17        |
| 1992             | 6,95       | 0,59        | 3,3         | 0,46       | 0,17        | 0,3         |
| 1993             | 5,66       | 0,6         | 2,75        | 0,27       | -           | 0,12        |
| 1994             | 6,03       | 0,7         | 2,94        | 0,38       | 0,1         | 0,22        |
| 1995             | 6,19       | 0,68        | 3           | 0,31       | 0,07        | 0,19        |
| 1996             | 6,74       | 0,66        | 3,28        | 0,35       | 0,04        | 0,18        |
| 1997             | 6,16       | 0,66        | 3,03        | 0,22       | 0,04        | 0,12        |
| 1998             | 5,83       | 0,45        | 2,8         | 0,38       | 0,05        | 0,2         |
| 1999             | 6,79       | 0,74        | 3,38        | 0,37       | 0,09        | 0,21        |
| 2000             | 6,55       | 0,71        | 3,28        | 0,24       | 0,14        | 0,19        |
| 2001             | 6,34       | 0,92        | 3,25        | 0,35       | 0,07        | 0,2         |
| 2002             | 5,59       | 0,77        | 2,83        | 0,46       | 0,08        | 0,24        |
| 2003             | 6,6        | 0,72        | 3,25        | 0,23       | 0,07        | 0,14        |
| 2004             | 6,8        | 0,62        | 3,36        | 0,39       | 0,13        | 0,24        |
| 2005             | 7,94       | 0,81        | 3,9         | 0,28       | 0,07        | 0,17        |
| 2006             | 7,24       | 0,88        | 3,7         | 0,37       | 0,11        | 0,22        |
| 2007             | 6,77       | 0,85        | 3,47        | 0,31       | 0,04        | 0,16        |
| 2008             | 7,1        | 0,86        | 3,65        | 0,27       | 0,08        | 0,17        |
| 2009             | 6,75       | 0,73        | 3,44        | 0,35       | 0,03        | 0,17        |
| 2010             | 7,74       | 0,68        | 3,76        | 0,32       | 0,15        | 0,22        |
| 2011             | 7,31       | 0,8         | 3,65        | 0,32       | 0,1         | 0,18        |
| 2012             | 6,94       | 0,84        | 3,6         | 0,25       | 0,13        | 0,18        |
| 2013             | 7,09       | 0,8         | 3,61        | 0,22       | 0,06        | 0,13        |
| 2014             | 6,67       | 0,77        | 3,42        | 0,28       | 0,15        | 0,21        |
| 2015             | 6,44       | 0,87        | 3,37        | 0,28       | 0,07        | 0,16        |
| 2016             | 6,88       | 0,93        | 3,61        | 0,17       | 0,09        | 0,13        |
| 2017             | 5,9        | 0,87        | 3,15        | 0,25       | 0,13        | 0,19        |
| 2018             | 6,58       | 0,77        | 3,35        | 0,21       | 0,13        | 0,18        |
| <b>1989-2018</b> | <b>6,6</b> | <b>0,74</b> | <b>3,28</b> | <b>0,3</b> | <b>0,09</b> | <b>0,18</b> |

National malignant mesothelioma incidence, per 100,000 person years (RESR). MPM= malignant pleural mesothelioma; MPeM= malignant peritoneal mesothelioma; M= male; F= female; T= total.

Supplementary table B: Annual Percentage Change for malignant mesothelioma incidence

| Type | Sex | Age      | From<br>(year) | To<br>(year) | APC<br>(%) | 95%CI<br>LL | 95%CI<br>UL | P-value |
|------|-----|----------|----------------|--------------|------------|-------------|-------------|---------|
| Both | M   | 0-54     | 1989           | 2018         | -6.2       | -7.2        | -5.2        | <0.01   |
| Both | M   | 55-64    | 1989           | 2009         | -1.2       | -2.5        | 0.1         | 0.1     |
|      |     |          | 2009           | 2018         | -9.4       | -13.1       | -5.4        | <0.01   |
| Both | M   | 65-79    | 1989           | 2006         | 3.4        | 2.3         | 4.5         | <0.01   |
|      |     |          | 2006           | 2018         | -1.8       | -3.5        | -0.1        | <0.01   |
| Both | M   | ≥80      | 1989           | 2018         | 3.3        | 2.5         | 4.1         | <0.01   |
| Both | F   | 0-54     | 1989           | 2018         | -0.3       | -2.1        | 1.5         | 0.7     |
| Both | F   | 55-64    | 1989           | 2018         | -0.1       | -1.4        | 1.1         | 0.8     |
| Both | F   | 65-79    | 1989           | 2018         | 1.8        | 0.9         | 2.6         | <0.01   |
| Both | F   | ≥80      | 1989           | 2018         | 4.6        | 2.2         | 6.9         | <0.01   |
| MPM  | M   | 0-54     | 1989           | 2018         | -6.1       | -7.6        | -4.6        | <0.01   |
| MPM  | M   | 55-64    | 1989           | 2011         | -1.6       | -2.7        | -0.4        | <0.01   |
|      |     |          | 2011           | 2016         | -16.9      | -28.9       | -0.3        | <0.01   |
|      |     |          | 2016           | 2018         | 52.3       | -6.9        | 149.0       | 0.1     |
| MPM  | M   | 65-79    | 1989           | 1991         | 22.1       | 5.9         | 40.7        | <0.01   |
|      |     |          | 1991           | 1994         | -6.2       | -18.7       | 8.1         | 0.3     |
|      |     |          | 1994           | 1998         | 8.2        | 0.7         | 16.1        | <0.01   |
|      |     |          | 1998           | 2001         | -6.4       | -18.8       | 7.9         | 0.3     |
|      |     |          | 2001           | 2004         | 14.0       | -1.1        | 31.4        | 0.1     |
|      |     |          | 2004           | 2018         | -1.8       | -2.5        | -1.2        | <0.01   |
| MPM  | M   | ≥80      | 1989           | 2018         | 3.2        | 2.3         | 4.1         | <0.01   |
| MPM  | F   | 0-54     | 1989           | 2018         | -0.8       | -2.5        | 1.0         | 0.4     |
| MPM  | F   | 55-64    | 1989           | 2018         | 0.0        | -1.4        | 1.3         | 1.0     |
| MPM  | F   | 65-79    | 1989           | 2018         | 1.6        | 0.7         | 2.5         | <0.01   |
| MPM  | F   | ≥80      | 1989           | 1991         | 188.6      | -11.1       | 837.2       | 0.1     |
|      |     |          | 1991           | 2018         | 3.1        | 1.0         | 5.2         | <0.01   |
| Both | M+F | All ages | 1889           | 2010         | 1.6        | 1           | 2.1         | <0.01   |
|      |     |          | 2010           | 2018         | -1.7       | -3.9        | 0.6         | 0.1     |
| MPM  | M+F | All ages | 1989           | 2007         | 1.8        | 1.1         | 2.5         | <0.01   |
|      |     |          | 2007           | 2018         | -1         | -2.5        | 0.4         | 0.2     |
| MPM  | M   | All ages | 1989           | 2009         | 1.4        | 0.7         | 2.0         | <0.01   |
|      |     |          | 2009           | 2018         | -1.8       | -3.9        | 0.4         | 0.1     |
| MPeM | M+F | All ages | 1989           | 2018         | -0.5       | -1.4        | 0.4         | 0.2     |
| MPeM | M   | All ages | 1989           | 2018         | -1.3       | -0.4        | -2.9        | <0.01   |
| MPeM | F   | All ages | 1989           | 2018         | 13.2       | -7.1        | 37.9        | 0.2     |

MPM=malignant pleural mesothelioma, MPeM=malignant peritoneal mesothelioma, M=male, F=female, APC=annual percentage change, CI=confidence interval, LL=lower limit, UL=upper limit.

Supplementary table C: Age specific malignant mesothelioma incidence rates

|           | Male |       |       |       | Female |       |       |      |
|-----------|------|-------|-------|-------|--------|-------|-------|------|
|           | 0-54 | 55-64 | 65-79 | 80+   | 0-54   | 55-64 | 65-79 | 80+  |
| 1989      | 1.14 | 10.67 | 17.1  | 19.88 | 0.21   | 1.39  | 1.66  | 3.31 |
| 1990      | 1.05 | 10.44 | 17.17 | 14.79 | 0.11   | 1.52  | 2.34  | 0.62 |
| 1991      | 0.81 | 9.75  | 19.84 | 15.2  | 0.15   | 0.97  | 2.18  | 0.29 |
| 1992      | 1.12 | 12.65 | 27.97 | 20.17 | 0.15   | 1.53  | 2.41  | 2.23 |
| 1993      | 0.7  | 11.56 | 20.51 | 20.76 | 0.05   | 0.95  | 2.05  | 2.92 |
| 1994      | 0.54 | 11.67 | 23.12 | 24.53 | 0.12   | 1.1   | 2.72  | 3.82 |
| 1995      | 0.83 | 11.83 | 21.76 | 26.06 | 0.08   | 1.22  | 3.03  | 2.15 |
| 1996      | 0.81 | 15.5  | 23.27 | 24.51 | 0.1    | 1.08  | 2.55  | 2.5  |
| 1997      | 0.71 | 12.12 | 23.12 | 20.64 | 0.15   | 1.21  | 1.99  | 3.29 |
| 1998      | 0.71 | 11.39 | 23.78 | 17.3  | 0.08   | 0.53  | 2.28  | 1.09 |
| 1999      | 0.72 | 10.22 | 31.61 | 16.2  | 0.2    | 1.56  | 2.7   | 2.18 |
| 2000      | 0.64 | 12.88 | 27.08 | 16.45 | 0.1    | 1.27  | 3.95  | 1.07 |
| 2001      | 0.54 | 11.53 | 25.12 | 24.88 | 0.12   | 1.36  | 4.18  | 2.6  |
| 2002      | 0.53 | 8.13  | 24.35 | 22.86 | 0.14   | 1.7   | 2.86  | 2.54 |
| 2003      | 0.3  | 10.91 | 26.75 | 27.5  | 0.22   | 0.86  | 3.11  | 1.6  |
| 2004      | 0.56 | 10.27 | 30.67 | 21.61 | 0.15   | 2.05  | 1.69  | 2.93 |
| 2005      | 0.3  | 9.78  | 36.39 | 30.45 | 0.04   | 1.74  | 3.59  | 2.38 |
| 2006      | 0.26 | 10.21 | 33.33 | 26.61 | 0.19   | 1.93  | 2.72  | 4.41 |
| 2007      | 0.42 | 8.08  | 31.48 | 24.2  | 0.11   | 1.28  | 3.54  | 2.93 |
| 2008      | 0.43 | 9.81  | 31.74 | 24.93 | 0.13   | 1.62  | 3.31  | 3.43 |
| 2009      | 0.36 | 8.68  | 30    | 28.57 | 0.07   | 1.12  | 2.95  | 2.89 |
| 2010      | 0.28 | 7.42  | 34.06 | 39.97 | 0.09   | 1.36  | 3.18  | 2.71 |
| 2011      | 0.3  | 7.86  | 28.42 | 46.43 | 0.08   | 1.29  | 3.24  | 4.18 |
| 2012      | 0.34 | 8.5   | 30.36 | 29.74 | 0.14   | 1.29  | 3.29  | 4.78 |
| 2013      | 0.18 | 7.89  | 28.6  | 41.15 | 0.1    | 1.2   | 3.11  | 3.95 |
| 2014      | 0.35 | 5.14  | 29.76 | 35.1  | 0.14   | 0.91  | 4     | 2.63 |
| 2015      | 0.15 | 4.64  | 28.4  | 38.39 | 0.17   | 1     | 3.42  | 4.09 |
| 2016      | 0.22 | 6.04  | 28.39 | 40.63 | 0.1    | 0.89  | 3.62  | 6.36 |
| 2017      | 0.12 | 3.19  | 25.84 | 38.59 | 0.08   | 1.33  | 3.45  | 5.59 |
| 2018      | 0.18 | 4.4   | 25.1  | 49.54 | 0.15   | 1.05  | 3.15  | 4.3  |
| 1989-2018 | 0.49 | 9.02  | 27.22 | 29.79 | 0.12   | 1.28  | 2.97  | 3.12 |

Age specific malignant mesothelioma (pleural and peritoneal combined) incidence, per 100,000 person years (RESR).
