# Supplementary figures and images for: Incidence, treatment and survival of malignant pleural and peritoneal mesothelioma: a population-based study
Source: PubMed Central journal article supplement — Thorax. 2022 Feb 11;77(12):1260–7. doi: 10.1136/thoraxjnl-2021-217709 (PMC9685713; doi:10.1136/thoraxjnl-2021-217709), 2022-02-11

## Malignant Mesothelioma Morphology

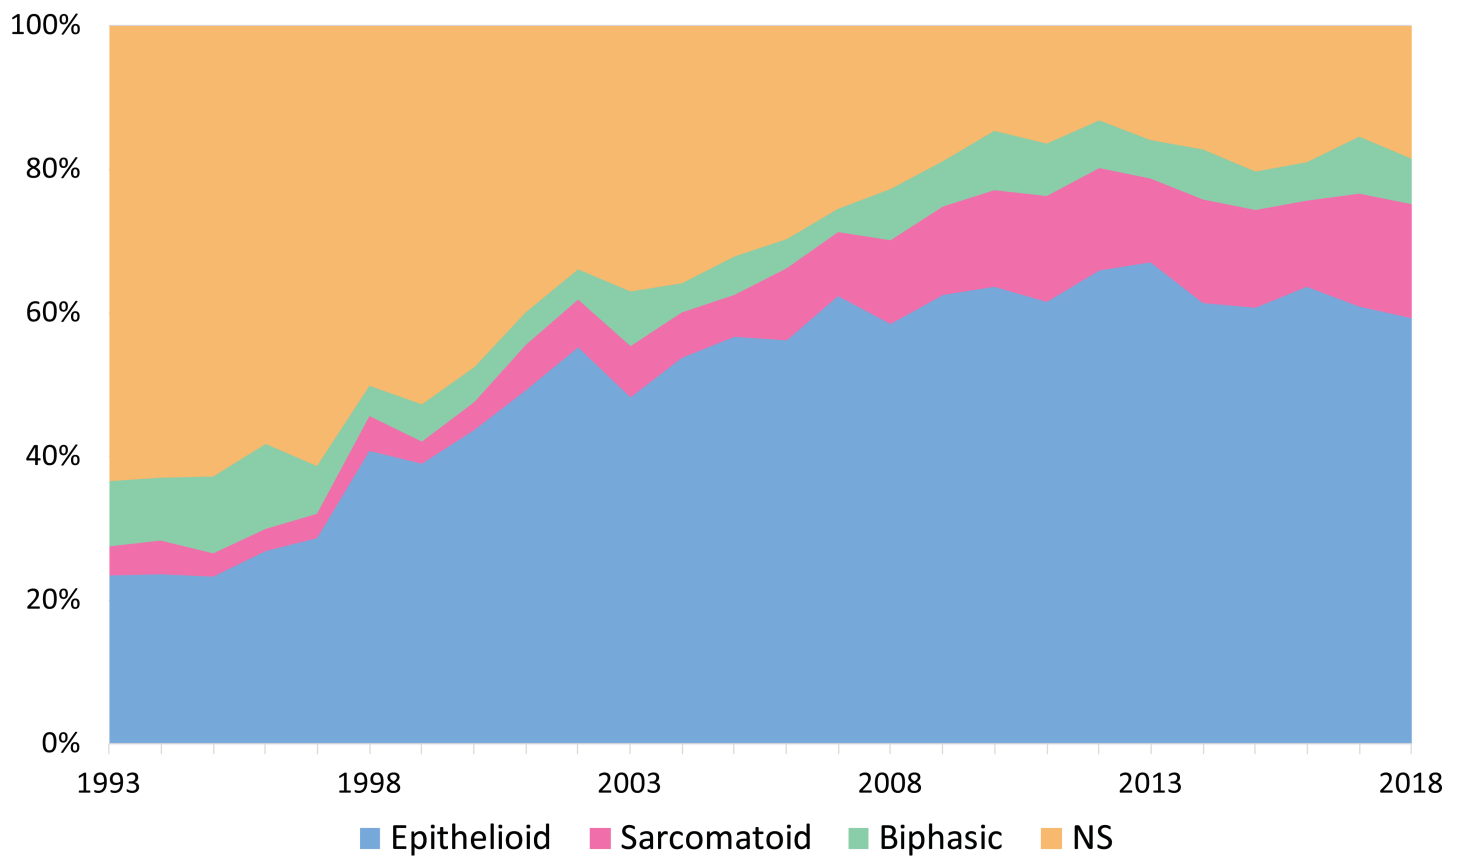

Supplement: thoraxjnl-2021-217709supp001.pdf [file thoraxjnl-2021-217709supp001.pdf]
