# Supplementary figures and images for: Incidence, treatment and survival of malignant pleural and peritoneal mesothelioma: a population-based study
Source: HighWire-hosted journal article supplement (doi:10.1136/thoraxjnl-2021-217709), 2022-02-11

MPM Stage of Disease

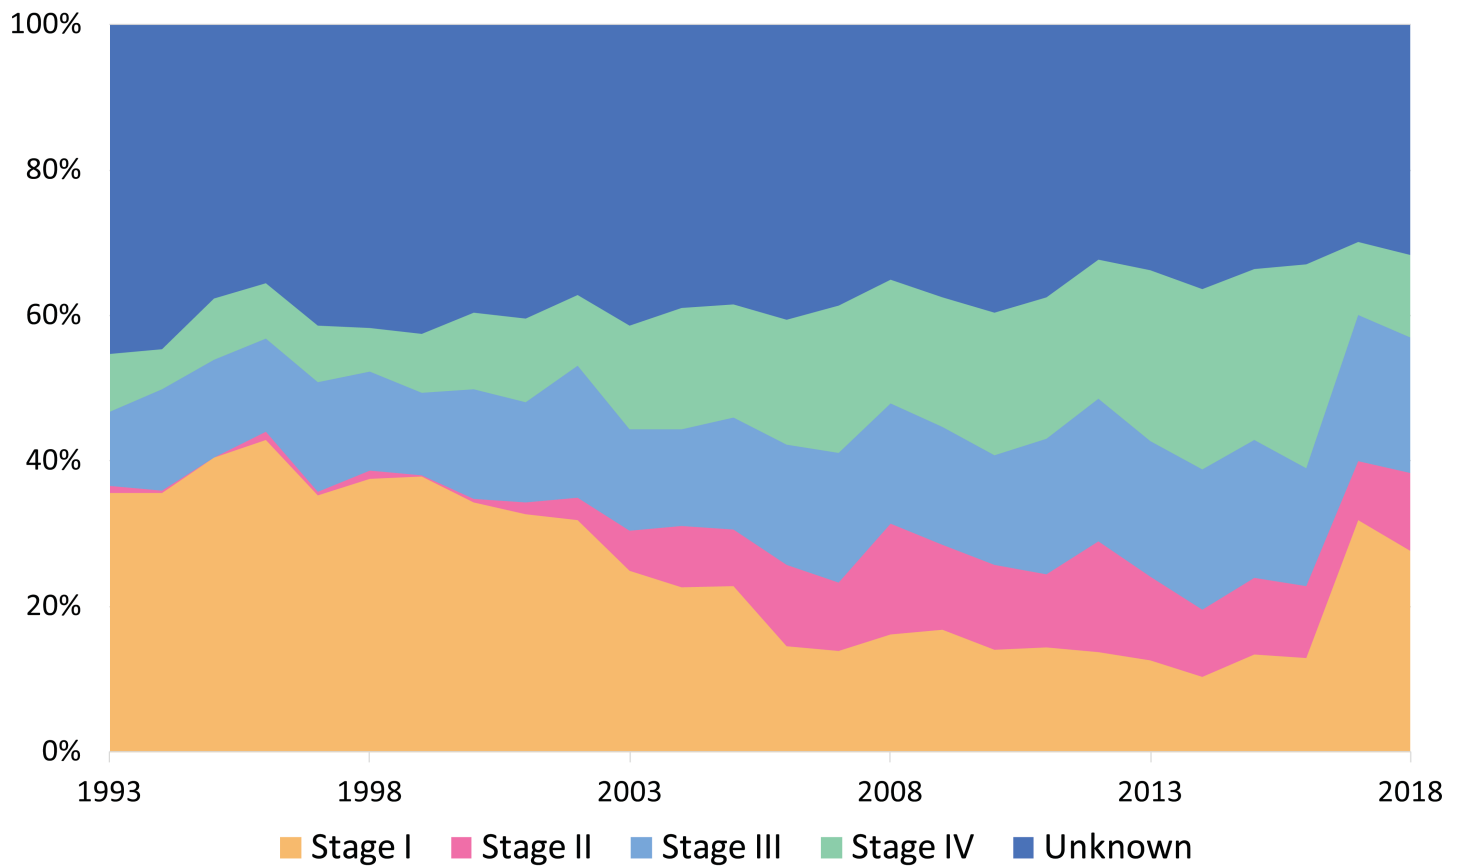

Supplement: thoraxjnl-2021-217709supp002_data_supplement.pdf [file thoraxjnl-2021-217709supp002_data_supplement.pdf]
